# Supplementary material for: Reduced Central Memory CD4+ T Cells and Increased T-Cell Activation Characterise Treatment-Naive Patients Newly Diagnosed at Late Stage of HIV Infection
Source: Hindawi journal article supplement (doi:10.1155/2012/314849), 2011-10-27
Supplement: f1 [file 314849.f1.pdf]

## Supplementary table 1

Comparison between AHD/AIDS presenters and N-LP

| <b>Patient's factors</b> |                        |                                  |          |
|--------------------------|------------------------|----------------------------------|----------|
| <b>a)</b>                | <b>N-LP (145, 53%)</b> | <b>AHD (79, 29%)</b>             | <b>p</b> |
| Age, years *             | 36 (30-43)             | 42 (34-52)                       | 0.0001   |
| Risk group °             |                        |                                  | 0.0001   |
| Heterosexuals            | 47 (32)                | 41 (52)                          | 0.016    |
| Other                    | 98 (68)                | 38 (48)                          |          |
| Migrants °               | 30 (21)                | 23 (29)                          | 0.156    |
| <b>b)</b>                | <b>N-LP (145, 53%)</b> | <b>AIDS presenters (49, 18%)</b> | <b>p</b> |
| Age, years *             | 36 (30-43)             | 42 (34-52)                       | 0.0001   |
| Risk group °             |                        |                                  | 0.003    |
| Heterosexuals            | 47 (32)                | 29 (59)                          |          |
| Other                    | 98 (68)                | 20 (41)                          |          |
| Migrants °               | 30 (21)                | 12 (25)                          | 0.577    |

  

| <b>T cell immuno-phenotypes</b> |                        |                                  |          |
|---------------------------------|------------------------|----------------------------------|----------|
| <b>c)</b>                       | <b>NLP (145, 53%)</b>  | <b>AHD (79, 29%)</b>             | <b>p</b> |
| CD4+ T cells/μL                 | 538 (441-698)          | 110 (56-192)                     |          |
| CD4+ T cells % *                | 28 (23-35)             | 10 (7-17)                        | 0.0001   |
| CD8+ T cells % *                | 45 (38-54)             | 59 (51-66)                       | 0.0001   |
| CD4+CD127+ cells % *            | 19 (12-24)             | 6 (3-11)                         | 0.0001   |
| CD8+CD127+ cells % *            | 10 (8-15)              | 12 (8-22)                        | 0.072    |
| CD4+CD95+ cells % *             | 2 (1-4)                | 2 (1-3)                          | 0.774    |
| CD8+CD95+ cells % *             | 2 (1-3)                | 3 (2-6)                          | 0.0001   |
| CD8+CD38+ cells % *             | 5 (2-9)                | 11 (3-25)                        | 0.0001   |
| CD8+CD38+CD45R0+ cells % *      | 9 (5-16)               | 14 (10-25)                       | 0.0001   |
| <b>d)</b>                       | <b>N-LP (145, 53%)</b> | <b>AIDS presenters (49, 18%)</b> | <b>p</b> |
| CD4+ T cells/μL                 | 538 (441-698)          | 132 (60-286)                     | 0.0001   |
| CD4+ T cells % *                | 28 (23-35)             | 13 (9-19)                        | 0.0001   |
| CD8+ T cells % *                | 45 (38-54)             | 59 (50-66)                       | 0.0001   |
| CD4+CD127+ cells % *            | 19 (12-24)             | 6 (4-11)                         | 0.0001   |
| CD8+CD127+ cells % *            | 10 (8-15)              | 13 (11-25)                       | 0.136    |
| CD4+CD95+ cells % *             | 2 (1-4)                | 2 (1-5)                          | 0.408    |
| CD8+CD95+ cells % *             | 2 (1-3)                | 3 (2-6)                          | 0.0001   |
| CD8+CD38+ cells % *             | 5 (2-9)                | 12 (5-23)                        | 0.0001   |
| CD8+CD38+CD45R0+ cells % *      | 9 (5-16)               | 16 (10-25)                       | 0.0001   |

NOTE (Supplementary table, a-d). Data are presented as \* median, (Interquartile Range, IQR) and ° absolute number, (%). Migrants, people who were born outside the European Community (including people from Eastern Europe, Africa, Asia and Latin America).

Comparison between categorical variables were assessed by Pearson's Chi square and between continuous variables by non parametric Mann Whitney U test.  $p < 0.05$  was considered to denote statistical significance.

## **Supplementary table 2**

Multivariate logistic regression analysis of the association of demographic and peripheral T lymphocyte immune phenotypes with AHD and AIDS presentation

| <b>Patient factors</b>                                | <b>AOR</b>                                  | <b>95% CI</b> | <b>p</b>      |
|-------------------------------------------------------|---------------------------------------------|---------------|---------------|
| <b>a)</b>                                             | <b>Advanced HIV disease at presentation</b> |               |               |
| Age, years                                            | 1.051                                       | 1.012-0.976   | <b>0.010</b>  |
| Risk group °                                          |                                             |               |               |
| Heterosexual                                          | 2.329                                       | 0.976-5.56    | 0.057         |
| Other                                                 | reference                                   |               |               |
| CD8+ T cells/ $\mu$ L %<br>(each unit more)           | 1.061                                       | 1.031-1.093   | <b>0.0001</b> |
| CD4+CD127+ cells/ $\mu$ L %<br>(each unit more)       | 0.837                                       | 0.792-0.884   | <b>0.0001</b> |
| CD8+CD95+ cells/ $\mu$ L%<br>(each unit more)         | 1.081                                       | 0.934-1.252   | 0.297         |
| CD8+CD38+ cells/ $\mu$ L %<br>(each unit more)        | 1.066                                       | 1.009-1.126   | <b>0.022</b>  |
| CD8+CD38+CD45R0+ cells/ $\mu$ L %<br>(each unit more) | 0.955                                       | 0.993-0.997   | <b>0.0001</b> |
| <b>b)</b>                                             | <b>AIDS-presenters</b>                      |               |               |
| Age, years                                            | 1.065                                       | 1.019-1.113   | <b>0.005</b>  |
| Risk group °                                          |                                             |               |               |
| Heterosexual                                          | 3.176                                       | 1.182-8.531   | 0.022         |
| Other                                                 | reference                                   |               |               |
| CD8+ T cells/ $\mu$ L %<br>(each unit more)           | 1.025                                       | 0.975-1.077   | 0.335         |
| CD4+CD127+ cells/ $\mu$ L %<br>(each unit more)       | 0.827                                       | 0.759-0.902   | <b>0.0001</b> |
| CD8+CD95+ cells/ $\mu$ L%<br>(each unit more)         | 1.037                                       | 0.880-1.221   | 0.666         |
| CD8+CD38+ cells/ $\mu$ L %<br>(each unit more)        | 1.078                                       | 1.015-1.146   | <b>0.015</b>  |
| CD8+CD38+CD45R0+ cells/ $\mu$ L %<br>(each unit more) | 0.996                                       | 0.994-0.999   | <b>0.004</b>  |

NOTE (Supplementary table 2, a-b) AOR, adjusted odds ratio; 95% CI, 95% confidence interval.  $p < 0.05$  was considered to denote statistical significance.

Other: homosexual, intravenous drug users and other risks groups.
